# Supplementary material for: Clinical, Laboratory and Histological Features of Dipeptidyl Peptidase-4 Inhibitor Related Noninflammatory Bullous Pemphigoid
Source: MDPI journal article supplement (doi:10.3390/jcm10091916), 2021-04-28
Supplement: s1 [file s1]

**Supplementary Table S1.** Comparison of patients' outcome in nonDPP4i and DPP4i patients.

|                                                                        | <b>NonDPP4i n=113</b> | <b>DPP4i n=14</b> |
|------------------------------------------------------------------------|-----------------------|-------------------|
| Topical steroid                                                        | 8                     | 2                 |
| Systemic CTS                                                           | 46                    | 8                 |
| Systemic CTS + azathioprine                                            | 46                    | 3                 |
| Systemic CTS + diamino-diphenylsulphon                                 | 1                     | 1                 |
| Systemic corticosteroid + methotrexate                                 | 5                     | 0                 |
| Azathioprine                                                           | 2                     | 0                 |
| Systemic CTS + azathioprine + diamino-diphenylsulphon                  | 1                     | 0                 |
| Systemic CTS + azathioprine + diamino-diphenylsulphon<br>+ IVIg        | 1                     | 0                 |
| No information                                                         | 3                     | 0                 |
| <i>CTS: corticosteroid; IVIg: intravenous immunoglobulin treatment</i> |                       |                   |
